# Supplementary material for: Preparation of Zn3Nb2O8 anode material for high-performance lithium/sodium-ion batteries
Source: Royal Society of Chemistry journal article supplement (doi:10.1039/d4ra03616f), 2024-01-01
Supplement: d4ra03616f1.pdf [file d4ra03616f1.pdf]

## Supporting Information

### **Preparation of $Zn_3Nb_2O_8$ anode material for high-performance lithium/sodium-ion batteries**

Xuemin Yin,<sup>a,\*</sup> Shuling Cheng,<sup>b</sup> Yuyang Zhang,<sup>c</sup> Chencheng liu,<sup>a</sup>

<sup>a</sup>Hebei Key Laboratory of Green Development of Rock and Mineral Materials, Hebei GEO University, Shijiazhuang 050031, China

<sup>b</sup>School of Chemical and Environmental Engineering, Shanghai Institute of Technology, Shanghai 201418, China

<sup>c</sup>Faculty of Robot Science and Engineering, Northeastern University, Liaoning 110819, China

\*Corresponding author

E-mail: xueminyin24@163.com

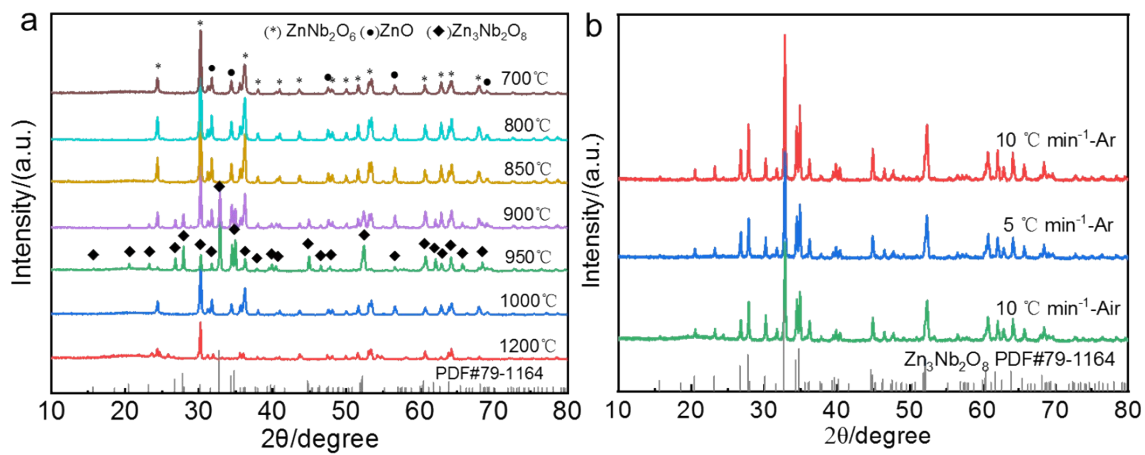

Figure S1. (a)XRD patterns of zinc niobate materials calcined to 700-1200 °C at 10 °C min<sup>-1</sup> in air. (b)XRD patterns of zinc niobium oxide with different calcination conditions.

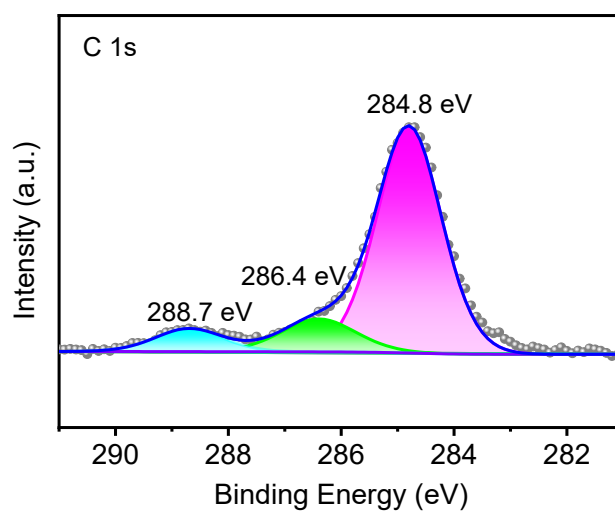

Figure S2. XPS spectra of Zn<sub>3</sub>Nb<sub>2</sub>O<sub>8</sub>-B for C 1s.

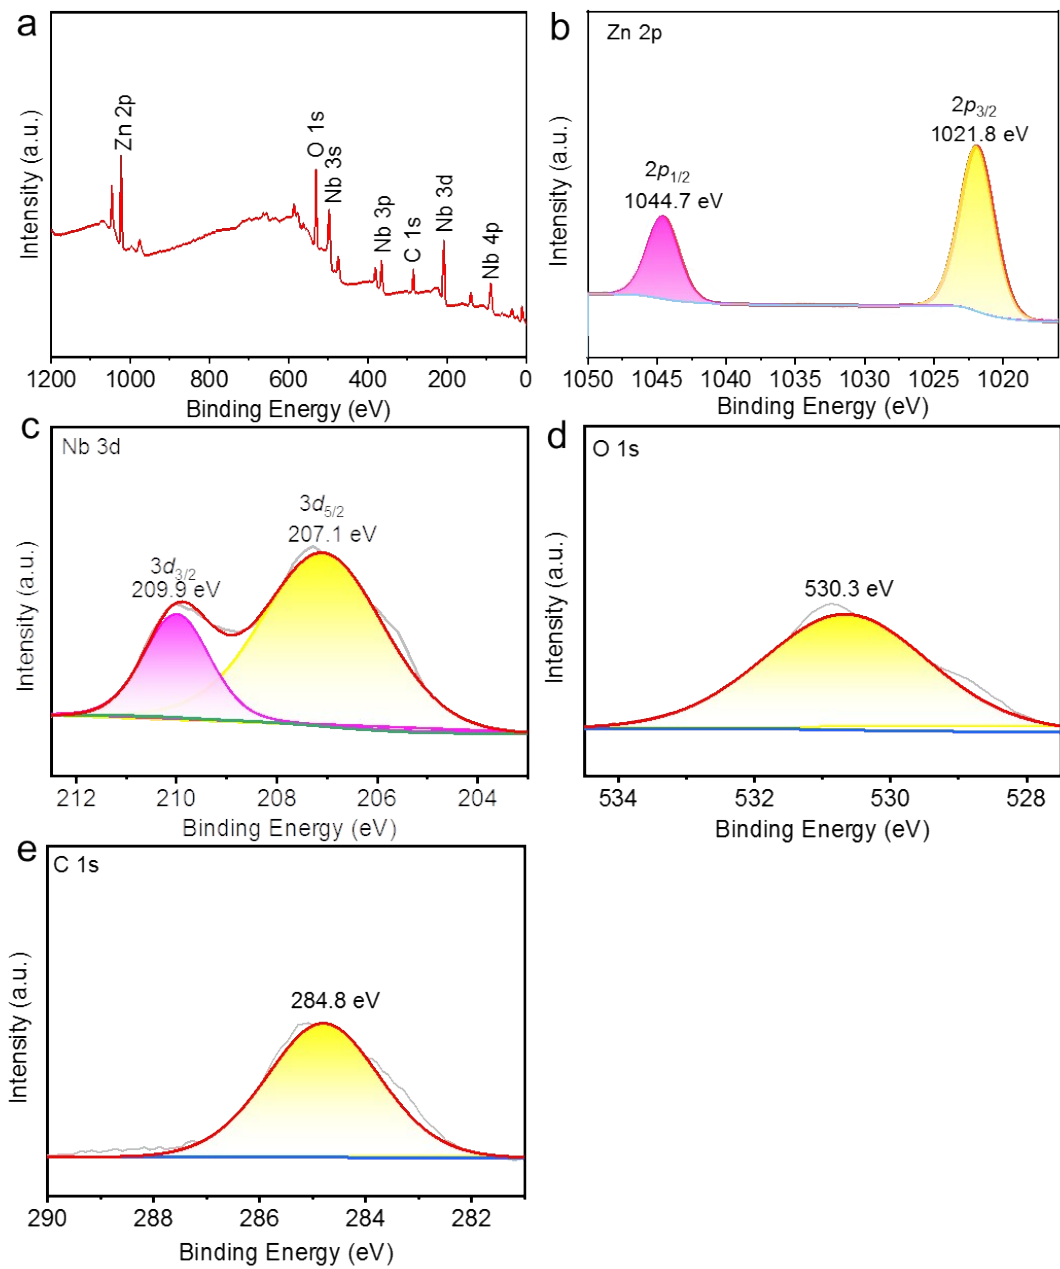

Figure S3. (a) XPS survey spectra of  $\text{Zn}_3\text{Nb}_2\text{O}_8\text{-A}$ ; XPS spectra of  $\text{Zn}_3\text{Nb}_2\text{O}_8\text{-A}$  for (b) Zn 2p, (c) Nb 3d, (d) O 1s and (e) C 1s.

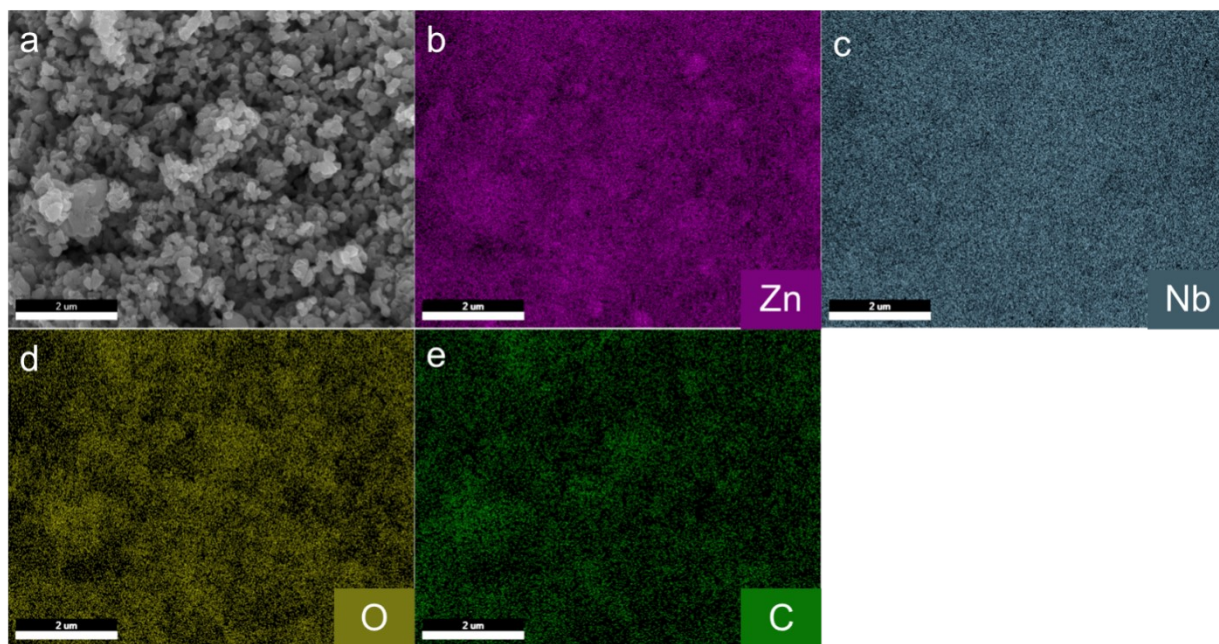

Figure S4. EDX mapping images of Zn<sub>3</sub>Nb<sub>2</sub>O<sub>8</sub>-A

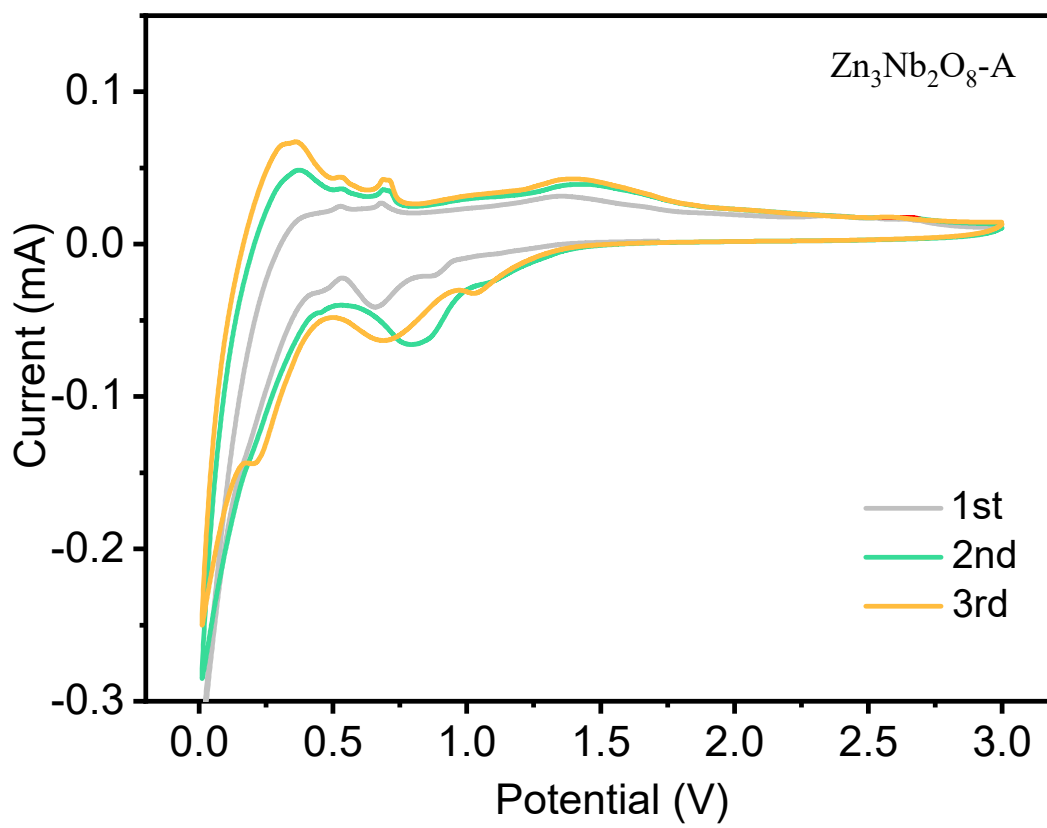

Figure S5. CV curves of Zn<sub>3</sub>Nb<sub>2</sub>O<sub>8</sub>-A at the scan rate of 0.1 mV s<sup>-1</sup>

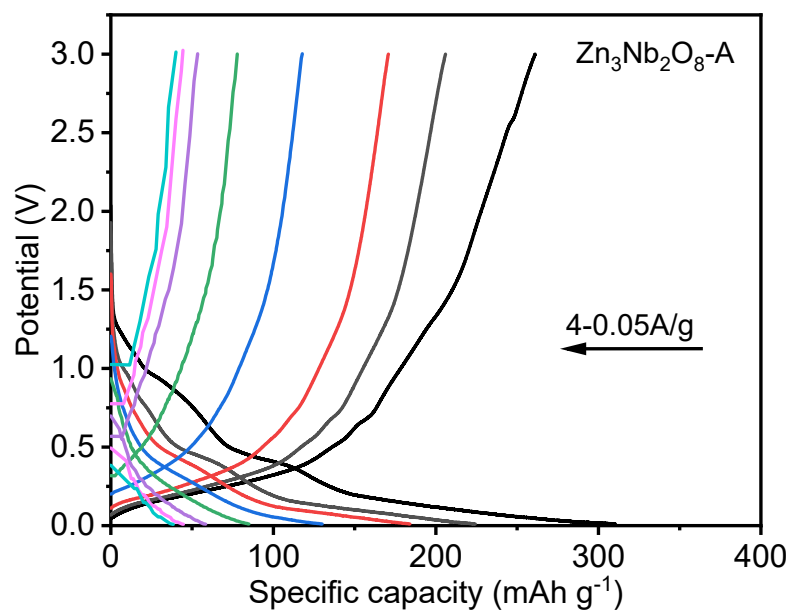

Figure S6. Galvanostatic charge/discharge (GCD) curves of Zn<sub>3</sub>Nb<sub>2</sub>O<sub>8</sub>-A at different current densities from 0.05 to 4.0 A g<sup>-1</sup>

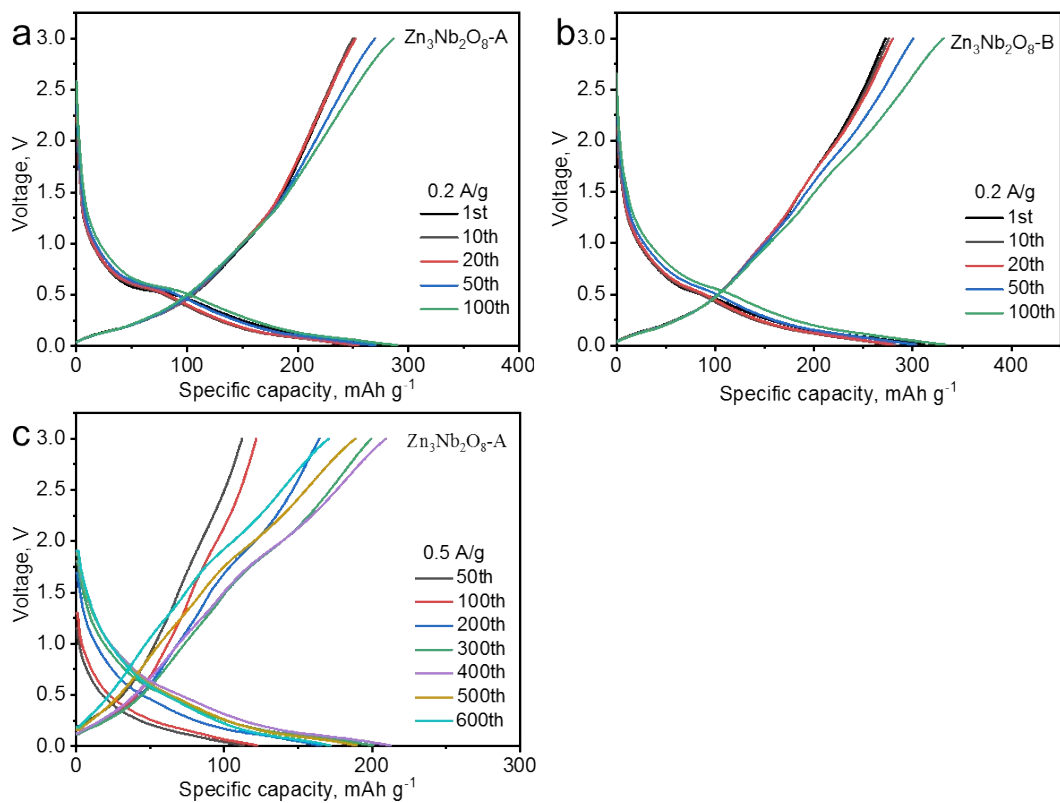

Figure S7. Discharge and charge curves of (a) Zn<sub>3</sub>Nb<sub>2</sub>O<sub>8</sub>-A and (b) Zn<sub>3</sub>Nb<sub>2</sub>O<sub>8</sub>-B at a current density of 0.2 A g<sup>-1</sup>; (c) Discharge and charge curves of Zn<sub>3</sub>Nb<sub>2</sub>O<sub>8</sub>-A at a current density of 0.5 A g<sup>-1</sup>



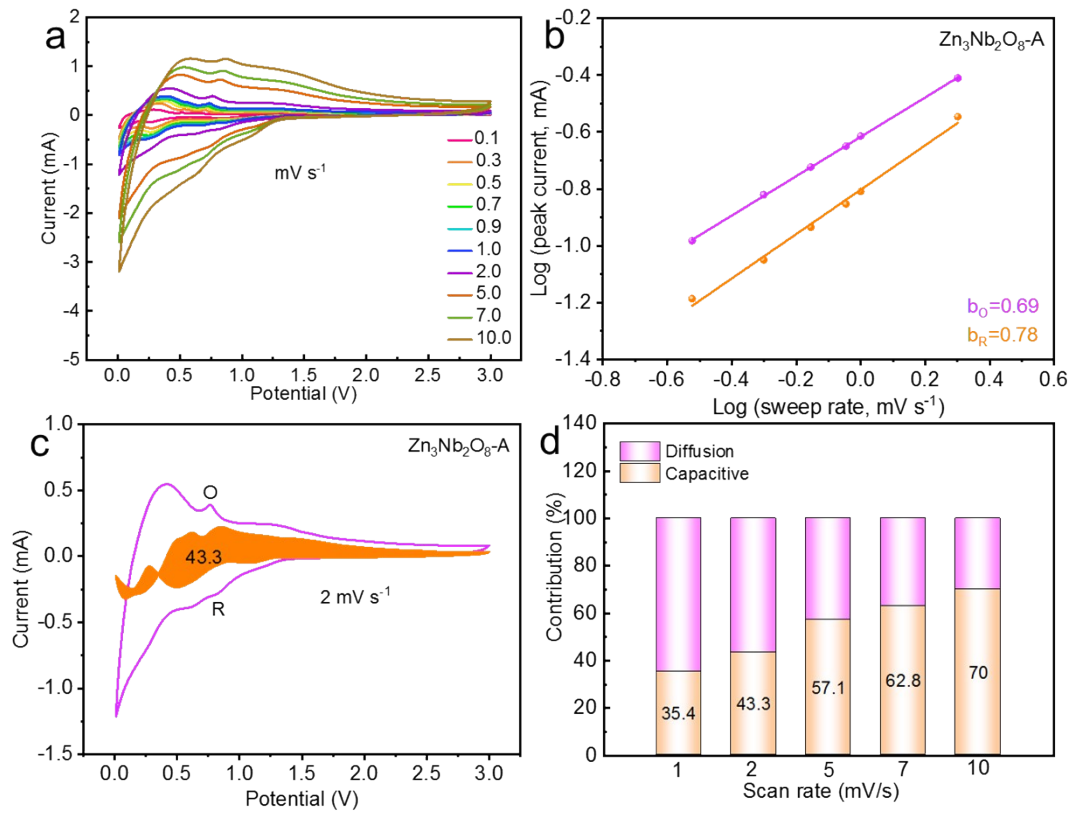

Figure S8. (a) CV curves of  $\text{Zn}_3\text{Nb}_2\text{O}_8\text{-A}$  from 0.1 to 10.0  $\text{mV s}^{-1}$ ; (b) Plots of  $\log(i)$  vs.  $\log(v)$  of the  $\text{Zn}_3\text{Nb}_2\text{O}_8\text{-A/Li}$  cell; (c) The pseudo-capacitive contribution of  $\text{Zn}_3\text{Nb}_2\text{O}_8\text{-B}$  electrode at the sweep rate of 2  $\text{mV s}^{-1}$ ; (d) Contribution ratios of diffusion- and capacitive- controlled capacities at different scan rates.

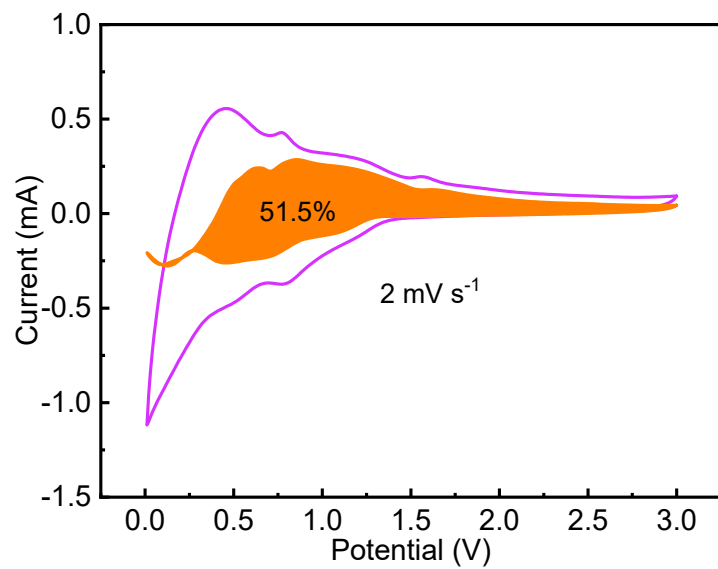

Figure S9. The pseudo-capacitive contribution of Zn<sub>3</sub>Nb<sub>2</sub>O<sub>8</sub>-B electrode at the sweep rate of 2 mV s<sup>-1</sup>;

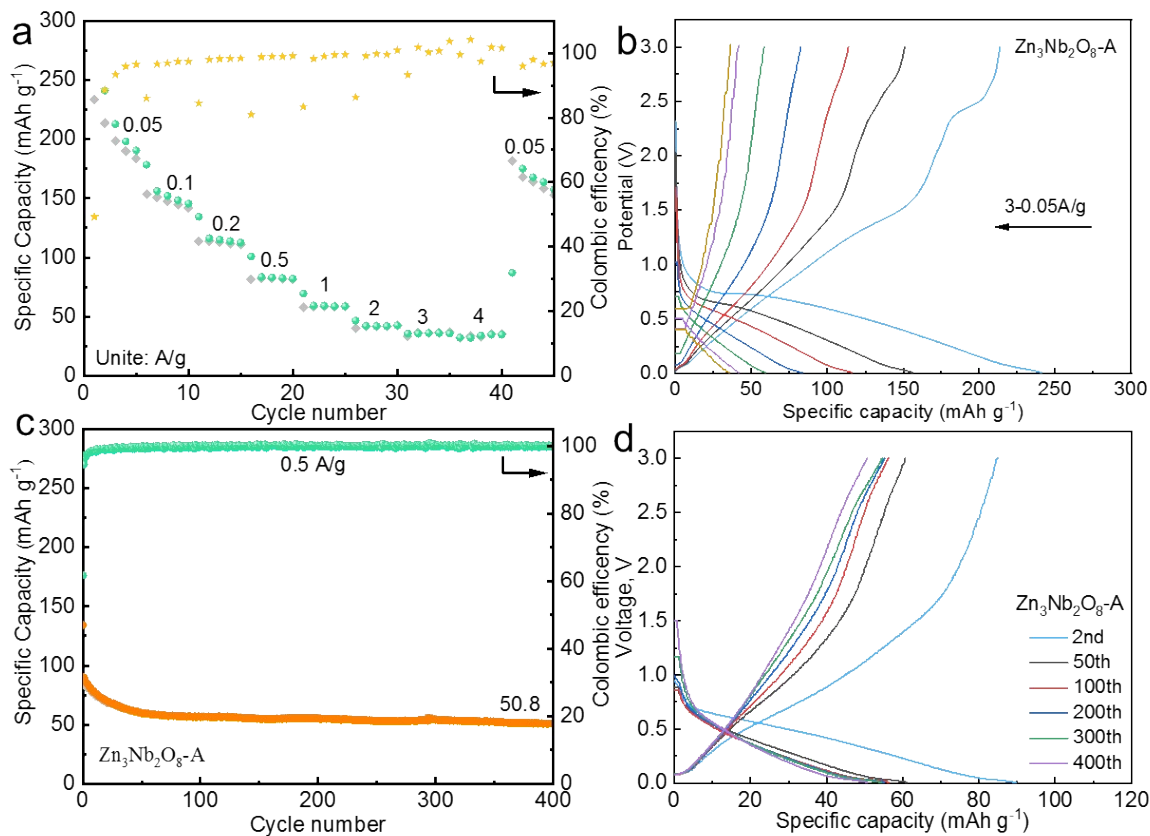

Figure S10. (a) Rate performances of  $\text{Zn}_3\text{Nb}_2\text{O}_8\text{-A}$  at different current densities for SIBs; (b) Galvanostatic discharge and charge curves of  $\text{Zn}_3\text{Nb}_2\text{O}_8\text{-A}$  at different current densities from 0.05 to 3.0  $\text{A g}^{-1}$ . (c) Cycling performances of  $\text{Zn}_3\text{Nb}_2\text{O}_8\text{-A}$  at a current density of 0.5  $\text{A g}^{-1}$ ; (d) Discharge and charge curves of  $\text{Zn}_3\text{Nb}_2\text{O}_8\text{-A}$  at a current density of 0.5  $\text{A g}^{-1}$ ;

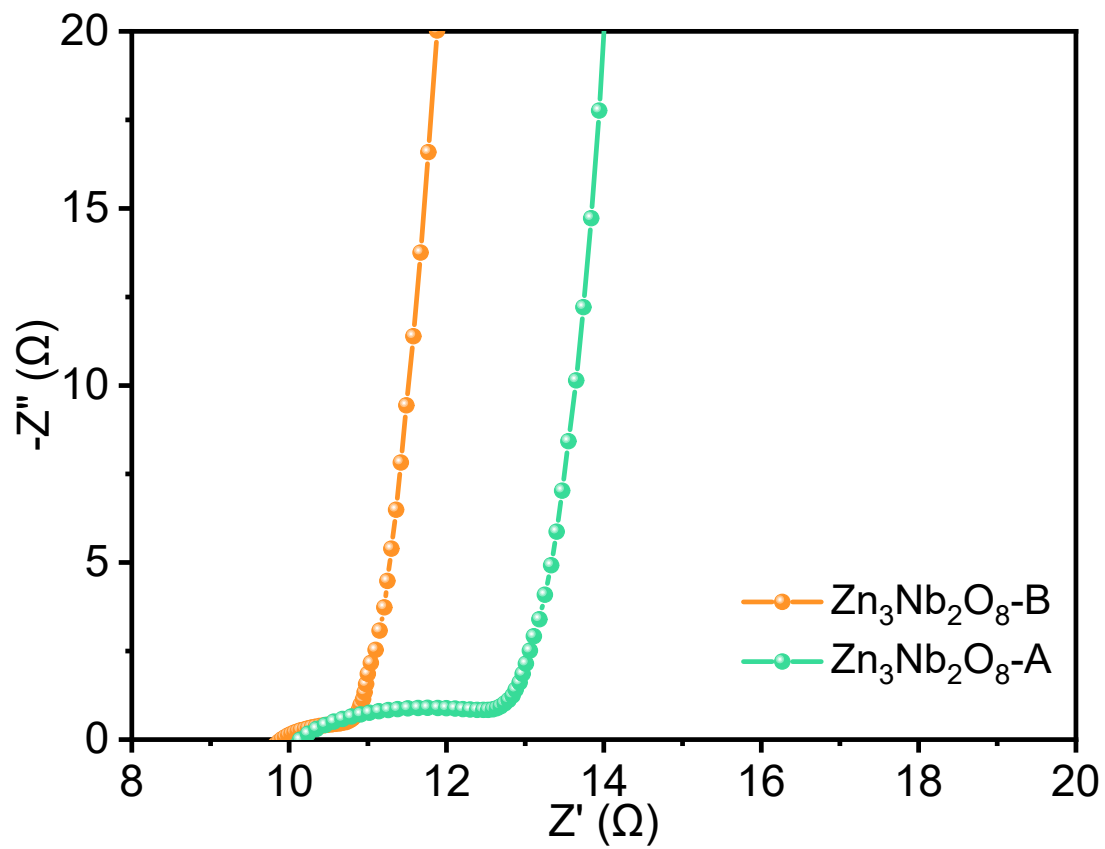

Figure S11. Nyquist plots of Zn<sub>3</sub>Nb<sub>2</sub>O<sub>8</sub>-A and Zn<sub>3</sub>Nb<sub>2</sub>O<sub>8</sub>-B

Table S1. Electrochemical energy storage performances of the reported Nb-based for the application in LIBs.

| Anode                                             | Current density (mA g <sup>-1</sup> ) | Cycling stability (mAh g <sup>-1</sup> )- capacity retention | Current density (mA g <sup>-1</sup> )/ capability (mAh g <sup>-1</sup> ) | Potential (V) | Ref.      |
|---------------------------------------------------|---------------------------------------|--------------------------------------------------------------|--------------------------------------------------------------------------|---------------|-----------|
| Nb <sub>2</sub> O <sub>5</sub>                    | 50                                    | 60.0 after 100 cycles (98%)                                  | 1000/16                                                                  | 0.01-3.0      | [1]       |
| K <sub>6</sub> Nb <sub>10.8</sub> O <sub>30</sub> | 100                                   | 150.0 after 400 cycles (80%)                                 | 800/50                                                                   | 0.5-3.0       | [2]       |
| ZnNb <sub>2</sub> O <sub>6</sub>                  | 100                                   | 181.9 after 100 cycles (50%)                                 | 5000/18                                                                  | 0.005–3.0 V   | [3]       |
| VNb <sub>9</sub> O <sub>25</sub>                  | 100                                   | 205.0 after 600 cycles (94.2%)                               | 1000/105                                                                 | 1.0-3.0       | [4]       |
| Bi <sub>5</sub> Nb <sub>3</sub> O <sub>15</sub>   | 100                                   | 212.1 after 100 cycles (66.4%)                               | 700/88.2                                                                 | 0.01-3.0      | [5]       |
| TiNb <sub>2</sub> O <sub>7</sub> @C               | 100                                   | 225.2 after 500 cycles (75.6%)                               | 3880/157.9                                                               | 0.01-3.0      | [6]       |
| CrNb <sub>49</sub> O <sub>124</sub>               | 200                                   | 190.0 after 500 cycles (66%)                                 | 500/198.0                                                                | 1.0-3.0       | [7]       |
| SnNb <sub>2</sub> O <sub>6</sub> @C               | 500                                   | 102.5 after 800 cycles (41%)                                 | 10000/67                                                                 | 0.01-3.0      | [8]       |
| GeNb <sub>18</sub> O <sub>47</sub>                | 500                                   | 162.1 after 200 cycles (94.6%)                               | 1000/123.2                                                               | 1.0-3.0       | [9]       |
| WNb <sub>12</sub> O <sub>33</sub>                 | 700                                   | 140.0 after 700 cycles (86.1%)                               | 700/115                                                                  | 1.0-3.0       | [10]      |
| Zn <sub>3</sub> Nb <sub>2</sub> O <sub>8</sub>    | 500                                   | 291.7 after 650 cycles (139.5%)                              | 4000/91.4                                                                | 0.01-3.0      | This work |

## References:

- [1] G.-Y. Zeng, H. Wang, J. Guo, L.-M. Cha, Y.-H. Dou, J.-M. Ma, *Chinese Chemical Letters* **2017**, *28*, 755.
- [2] H. Zhu, X. Cheng, H. Yu, W. Ye, N. Peng, R. Zheng, T. Liu, M. Shui, J. Shu, *Nano Energy* **2018**, *52*, 192.
- [3] X.F. Li, J. Li, R.N. Ali, Z. Wang, G.J. Hu, B. Xiang, *Chemical Engineering Journal* **2019**, *368*, 764.
- [4] S. Qian, H. Yu, L. Yan, H. Zhu, X. Cheng, Y. Xie, N. Long, M. Shui, J. Shu, *ACS Applied Materials Interfaces* **2017**, *9*, 30608.
- [5] Y. Li, R. Zheng, H. Yu, X. Cheng, H. Zhu, Y. Bai, T. Liu, M. Shui, J. Shu, *Ceramics International* **2018**, *44*, 11505.
- [6] G. Zhu, Q. Li, R. Che, *Chemistry* **2018**, *24*, 12932.
- [7] W. Ye, H. Yu, X. Cheng, H. Zhu, R. Zheng, T. Liu, N. Long, M. Shui, J. Shu, *ACS Applied Energy Materials* **2019**, *2*, 2672.
- [8] T. Liu, X. Yin, X. Yin, S. Cheng, X. Wang, Y. Zhao, *Chemistry-An Asian Journal* **2022**, *17*, e202200288.
- [9] F. Ran, X. Cheng, H. Yu, R. Zheng, T. Liu, X. Li, N. Ren, M. Shui, J. Shu, *Electrochimica Acta* **2018**, *282*, 634.
- [10] L. Yan, H. Lan, H. Yu, S. Qian, X. Cheng, N. Long, R. Zhang, M. Shui, J. Shu, *Journal of Materials Chemistry A* **2017**, *5*, 8972.
